# Supplementary material
Source: MDPI journal article supplement (https://www.mdpi.com/2311-5637/10/5/235)
Supplement: s1 [file s1]

| <i>Major compounds (mg/l)</i>    | <b>Presenta</b> | <b>Valjevka</b> | <b>Čačanská<br/>lepotica</b> | <b>Čačanská<br/>rodna</b> |
|----------------------------------|-----------------|-----------------|------------------------------|---------------------------|
| Methyl acetate                   | 6.12            | 10.3            | 6.23                         | 4.90                      |
| Ethyl acetate                    | 168             | 88.5            | 18.8                         | 143                       |
| Methanol                         | 821             | 723             | 678                          | 621                       |
| 2-Butanol                        | 6.20            | 25.6            | 1.42                         | 57.0                      |
| 1-Propanol                       | 310             | 948             | 184                          | 3841                      |
| Isobutanol                       | 43.5            | 40.1            | 127                          | 42.3                      |
| Isoamyl alcohol                  | 110             | 114             | 218                          | 125                       |
| Ethyl (-)-L-lactate              | 92.4            | 94.6            | 56.1                         | 62.7                      |
| Acetic acid                      | 39.4            | 55.9            | 6.50                         | 54.9                      |
| <i><b>Carbonyl compounds</b></i> |                 |                 |                              |                           |
| Acetaldehyde                     | 54.4            | 25.0            | 42.7                         | 148                       |
| Acetone                          | 0               | 0               | 3.49                         | 0                         |
| 2,3-Butandione                   | 20.2            | 0               | 25.9                         | 11.0                      |
| Furfural                         | 57.4            | 30.4            | 58.0                         | 28.0                      |
| Benzaldehyde                     | 18.8            | 10.2            | 59.6                         | 13.1                      |
| <i><b>Minor esters</b></i>       |                 |                 |                              |                           |
| Propyl acetate                   | 9.88            | 16.4            | 0                            | 86.1                      |
| Butyl acetate                    | 8.62            | 4.26            | 4.22                         | 9.69                      |
| Isoamyl acetate                  | 14.1            | 13.5            | 7.28                         | 22.6                      |
| Ethyl caprylate                  | 11.4            | 9.04            | 8.14                         | 6.05                      |
| Ethyl caprate                    | 18.6            | 16.8            | 23.3                         | 10.3                      |
| Ethyl benzoate                   | 37.7            | 18.4            | 8.68                         | 13.2                      |
| Diethyl succinate                | 17.5            | 19.8            | 10.8                         | 11.0                      |
| Ethyl (E)-2-decenoate            | 1.22            | 1.34            | 0.00                         | 2.12                      |
| Ethyl salicylate                 | 0.79            | 0.58            | 0.75                         | 0.00                      |
| 2-Phenylethyl acetate            | 0.83            | 0.73            | 0.54                         | 0.00                      |
| Ethyl laurate                    | 9.56            | 7.78            | 11.78                        | 5.40                      |
| Ethyl myristate                  | 4.09            | 2.79            | 2.75                         | 2.10                      |
| Ethyl cinnamate                  | 0.91            | 0               | 1.29                         | 0.00                      |
| Ethyl palmitate                  | 23.9            | 23.1            | 15.5                         | 17.0                      |
| Ethyl stearate                   | 1.13            | 1.99            | 1.06                         | 0.99                      |
| Ethyl oleate                     | 31.4            | 30.5            | 19.4                         | 22.4                      |
| Ethyl linoleate                  | 15.0            | 14.8            | 13.7                         | 12.3                      |
| <i><b>Minor alcohols</b></i>     |                 |                 |                              |                           |
| 1-Butanol                        | 43.3            | 41.8            | 16.8                         | 14.2                      |
| Pentanol                         | 2.91            | 1.77            | 1.67                         | 1.66                      |
| Hexanol                          | 13.4            | 10.3            | 13.2                         | 12.4                      |
| Linalool                         | 15.3            | 12.6            | 9.27                         | 19.3                      |
| Octanol                          | 1.87            | 1.73            | 1.04                         | 1.14                      |

|                 |      |      |      |      |
|-----------------|------|------|------|------|
| Nonanol         | 6.58 | 3.66 | 5.39 | 2.86 |
| Decanol         | 0.75 | 0.93 | 1.03 | 0    |
| Nerol           | 0.66 | 0.41 | 0.55 | 0    |
| Geraniol        | 53.0 | 29.4 | 23.7 | 18.2 |
| Benzyl alcohol  | 52.7 | 46.7 | 14.5 | 45.8 |
| 2-Phenylethanol | 5.32 | 4.50 | 5.16 | 4.16 |
| Eugenol         | 21.9 | 13.5 | 22.0 | 13.0 |
